# Supplementary material for: Element table of TM-substituted polyoxotungstates for direct electrocatalytic reduction of nitric oxide to ammonia: a DFT guideline for experiments
Source: Royal Society of Chemistry journal article supplement (doi:10.1039/d0qi01014f), 2020-01-01
Supplement: d0qi01014f1.pdf [file d0qi01014f1.pdf]

## Supporting Information

### Element Table of TM-substituted Polyoxotungstates for Direct Electrocatalytic Reduction of Nitric Oxide to Ammonia: A DFT Guideline for Experiments

Zhongling Lang,<sup>a</sup> § Jun Miao,<sup>b,d</sup> § Huaqiao Tan<sup>\*a</sup>, Zhongmin Su<sup>a,c</sup>, Yangguang Li <sup>\*a</sup>, and Zhiping Zheng<sup>b</sup>

<sup>a</sup>. Key Laboratory of Polyoxometalate Science of the Ministry of Education, Faculty of Chemistry, Northeast Normal University, Changchun, 130024, China; E-mail: tanhq870@nenu.edu.cn; liyg658@nenu.edu.cn

<sup>b</sup>. Guangdong Provincial Key Laboratory of Catalysis, Shenzhen Grubbs Institute and Department of Chemistry, Southern University of Science and Technology, Shenzhen, Guangdong 518000, P. R. China

<sup>c</sup>. Jilin Provincial Science and Technology Innovation Center of Optical Materials and Chemistry, School of Chemistry and Environmental Engineering, Changchun University of Science and Technology, Changchun 130022, P. R. China

<sup>d</sup>. Institut für Energie- und Klimaforschung (IEK-5), Forschungszentrum Jülich GmbH, 52425, Jülich, Germany

\*Corresponding authors

E-mail adress: tanhq870@nenu.edu.cn (H.Q. Tan), liyg658@nenu.edu.cn. (Y.G. Li).

### Table of contents

| Section                                                                              | Page   |
|--------------------------------------------------------------------------------------|--------|
| Computational details for the periodic POM-graphene model                            | S2     |
| Supporting Figures                                                                   | S3-S4  |
| Supporting Tables                                                                    | S5     |
| xyz coordination for the intermediates related to SiW <sub>11</sub> Fe <sup>II</sup> | S6-S18 |

## Computational details for the periodic POM-graphene model

Considering the low electroconductivity and specific surface area of polyoxometalates, we constructed a composite model by adsorbing the  $\text{SiW}_{11}\text{Ni}^{\text{II}}$  on the graphene surface, aiming to evaluate its possibility in experiment and promote this kind of catalysts applied in NOER in a quite near future.

With regard to the size of the Keggin anion ( $\sim 11 \text{ \AA}$ ), we built a orthogonal cell  $17.33 \times 17.15 \times 30 \text{ \AA}$  with 112 carbon atoms to support the polyoxometalate  $\text{SiW}_{11}\text{O}_{39}\text{Ni}^{\text{II}}(\text{H}_2\text{O})$ . The c direction was set to  $30 \text{ \AA}$  by considering a vacuum space of  $>15 \text{ \AA}$ , which was proven to be sufficient to prevent the interactions between the replicated cells. Previous study has suggested the adsorption of POM on the graphene are thermodynamic preferable via the S4 orientation, therefore only this orientation is considered in this work.<sup>[1]</sup> Regarding to the anion character, we introduced six hydrogen to balance the negative charge and keeps neutral for the whole system. In Figure S4, a  $2 \times 2$  supercell for  $\text{H}_6\text{SiW}_{11}\text{O}_{39}\text{Ni}(\text{H}_2\text{O})$  deposited on the graphene surface is displayed. The isolated POM molecule was calculated in a cubic box with a  $25 \text{ \AA}$  side.

All first-principles calculations were performed using the Vienna ab initio simulation package (VASP5.3). We set the kinetic energy cutoff to 400 eV and used the PBE functional to describe the exchange correlation potential.<sup>[2]</sup> The van der Waals interactions were corrected by DFT-D3 method with B–J damping.<sup>[3]</sup> The interaction between valence electrons and the corresponding pseudopotential for each atom was taken into account with the projector augmented wave (PAW) scheme.<sup>[4]</sup> A Monkhorst–Pack k-mesh sampling of  $3 \times 3 \times 1$  was used for structural optimization and density of states (DOS) calculations.<sup>[5]</sup> All optimizations were reached until self-consistency, with thresholds of  $1 \times 10^{-5} \text{ eV}$  and  $0.02 \text{ eV \AA}^{-1}$  for electronic and ionic convergence, respectively.

## References

- [1] S. Z. Wen, W. Guan, J. P. Wang, Z. L. Lang, L. K. Yan and Z. M. Su, *Dalton Trans.*, 2012, 41, 4602–4607.
- [2] J. P. Perdew, K. Burke and M. Ernzerhof, *Phys. Rev. Lett.* 1996, 77, 3865.
- [3] S. Grimme, J. Antony, S. Ehrlich and S. Krieg, *J. Chem. Phys.* 2010, 132, 154104.
- [4] P. E. Blöchl. *Phys. Rev. B: Condens. Matter Mater. Phys.* 1994, 50, 17953–17979.
- [5] H. J. Monkhorst and J. D. Pack. *Phys. Rev. B: Solid State.* 1976, 13, 5188–5192.

|     | PCM model                                         | HSM model                                        |
|-----|---------------------------------------------------|--------------------------------------------------|
| TS1 | <p><math>f/i = -1160.5 \text{ cm}^{-1}</math></p> | <p><math>f/i = -645.4 \text{ cm}^{-1}</math></p> |
| TS2 | <p><math>f/i = -716.9 \text{ cm}^{-1}</math></p>  | <p><math>f/i = -889.7 \text{ cm}^{-1}</math></p> |

**Fig. S1.** The transition state diagrams for the successive reduction of \*NO to \*NHO and \*NHOH based on the PCM and HSM models.

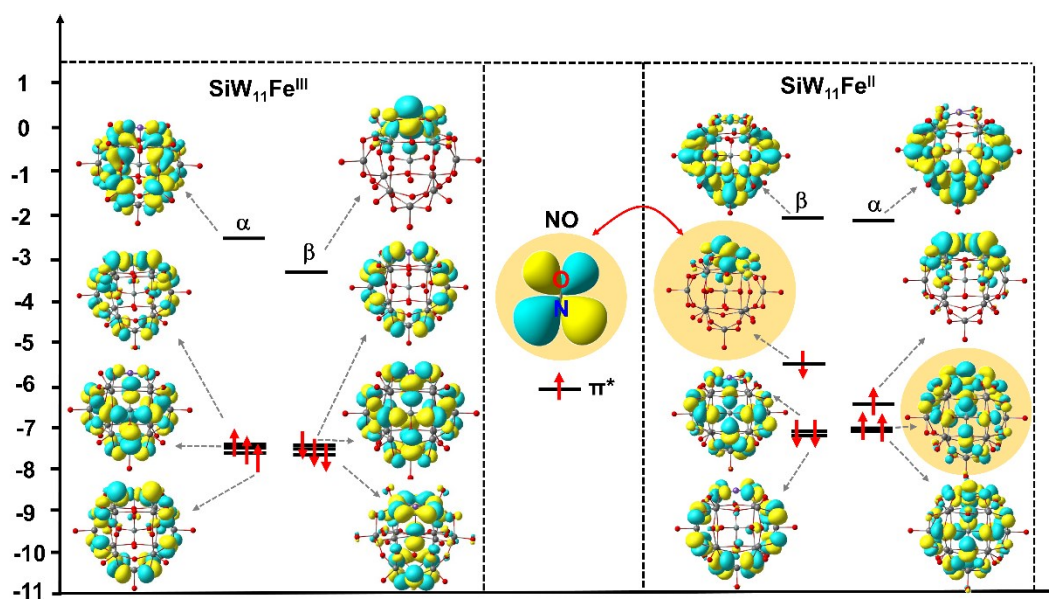

**Fig. S2.** Representation of the Kohn-Sham frontier molecular orbitals for the  $\text{SiW}_{11}\text{Fe}^{\text{II}}$ ,  $\text{SiW}_{11}\text{Fe}^{\text{III}}$ , and the individual NO.

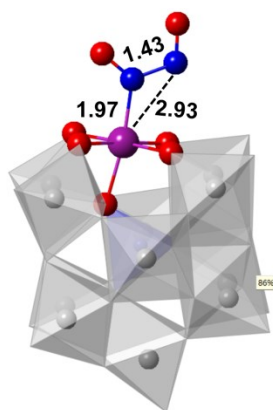

**Fig. S3.** The geometric representation (distance in Å) for the adsorption of two NO on  $\text{SiW}_{11}\text{Fe}^{\text{II}}$ .

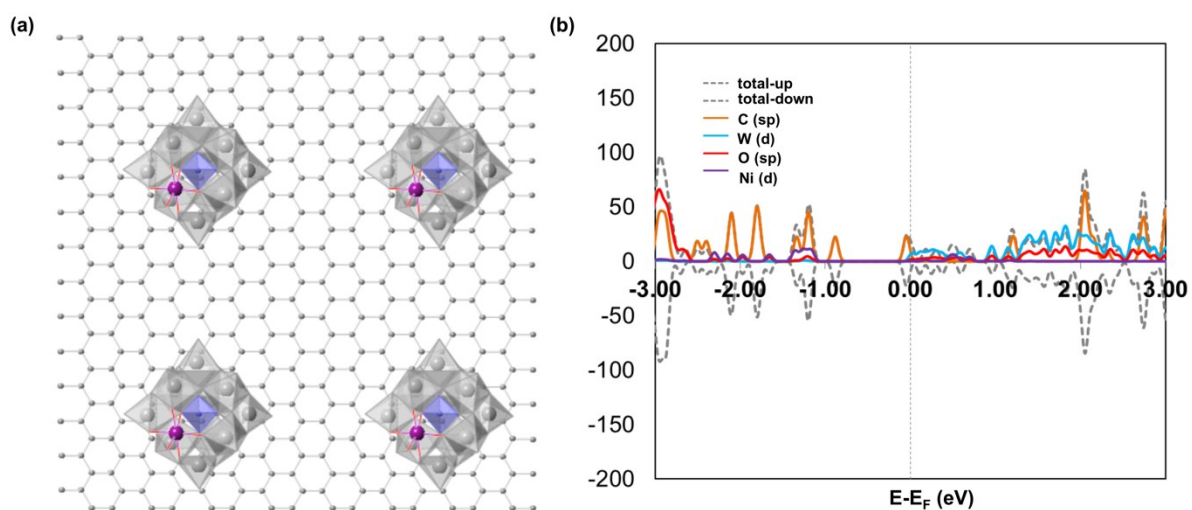

**Fig. S4.** (a) Ball-stick-polyhedra representation of the optimized geometries (a  $2 \times 2$  supercell) for  $\text{H}_6\text{SiW}_{11}\text{O}_{39}\text{Ni}(\text{H}_2\text{O})$  deposited on the graphene surface at VASP/PBE-D3/kpoint (111) level; (b) Projected density of states for  $\text{H}_6\text{SiW}_{11}\text{O}_{39}\text{Ni}(\text{H}_2\text{O})$ -GO model.

**Table S1.** The relative electronic energies (eV) for the possible intermediates involved in each elementary electronic reduction step catalyzed by  $\text{SiW}_{11}\text{Fe}^{\text{II}}$ .

| Reduction step              | Species                                                               | Multiplicity | $\Delta E$ (eV) |
|-----------------------------|-----------------------------------------------------------------------|--------------|-----------------|
| NO-ads                      | $\text{SiW}_{11}\text{Fe}^{\text{II}}\text{-NO}$                      | S4           | 0.00            |
|                             |                                                                       | S6           | 0.43            |
| + $1\text{H}^+/1\text{e}^-$ | $\text{SiW}_{11}\text{Fe}^{\text{II}}\text{-NHO}$                     | S3           | 0.44            |
|                             |                                                                       | S5           | 0.00            |
|                             | $\text{SiW}_{11}\text{Fe}^{\text{II}}\text{-NOH}$                     | S3           | ---             |
|                             |                                                                       | S5           | 1.04            |
| + $2\text{H}^+/2\text{e}^-$ | $\text{SiW}_{11}\text{Fe}^{\text{II}}\text{-NHOH}$                    | S2           | 0.41            |
|                             |                                                                       | S4           | 0.04            |
|                             |                                                                       | S6           | 0.00            |
|                             | $\text{SiW}_{11}\text{Fe}^{\text{II}}\text{-NH}_2\text{O}$            | S2           | 1.55            |
|                             |                                                                       | S4           | 1.27            |
| + $3\text{H}^+/3\text{e}^-$ | $\text{SiW}_{11}\text{Fe}^{\text{II}}\text{-NH}_2\text{OH}$           | S3           | 1.95            |
|                             |                                                                       | S5           | 0.00            |
|                             | $\text{SiW}_{11}\text{Fe}^{\text{II}}\text{-NH-H}_2\text{O}$          | S3           | 2.61            |
|                             |                                                                       | S5           | 1.49            |
| + $4\text{H}^+/4\text{e}^-$ | $\text{SiW}_{11}\text{Fe}^{\text{II}}\text{-NH}_2\text{-H}_2\text{O}$ | S4           | 0.58            |
|                             |                                                                       | S6           | 0.00            |
| + $5\text{H}^+/5\text{e}^-$ | $\text{SiW}_{11}\text{Fe}^{\text{II}}\text{-NH}_3\text{-H}_2\text{O}$ | S5           | 0.00            |

xyz coordination for the intermediates related to  $\text{SiW}_{11}\text{Fe}^{\text{II}}$

$\text{SiW}_{11}\text{Fe}^{\text{II}}$

-6 5

|    |             |             |             |
|----|-------------|-------------|-------------|
| W  | 1.90486700  | 2.39365100  | -1.92254500 |
| W  | 1.95016200  | 2.44123100  | 1.48395600  |
| W  | 1.02253100  | -3.35223400 | -0.17267800 |
| W  | -2.87059600 | 0.97097100  | -2.08949600 |
| W  | 2.91798100  | -1.14567700 | 1.48237900  |
| W  | -2.83482000 | 0.97387100  | 1.68057700  |
| W  | -1.97401300 | -2.25833500 | 1.67709000  |
| W  | -0.09961000 | -0.03248200 | 3.35411000  |
| W  | 2.86832100  | -1.13711200 | -1.93712700 |
| W  | -0.79287700 | 3.41800700  | -0.16717100 |
| W  | -2.00110500 | -2.24638600 | -2.08044300 |
| Si | -0.02782000 | -0.00914100 | -0.17954700 |
| O  | -4.38154500 | 1.70465100  | -2.47674300 |
| O  | 2.36950500  | -2.96801900 | -1.46822700 |
| O  | 1.24582600  | -1.04783900 | -0.21363400 |
| O  | -2.01723700 | 0.98988400  | -3.65358400 |
| O  | 4.29650100  | -1.42450900 | -2.85824800 |
| O  | -0.31530900 | -3.05986400 | 1.16699300  |
| O  | 0.74435400  | 1.54173900  | 2.69153000  |
| O  | 0.55378700  | 1.52935300  | -0.20142500 |
| O  | -1.86261100 | 2.50033300  | -1.42361600 |
| O  | -2.44084200 | -2.27032800 | -0.11275400 |
| O  | 2.86707500  | 0.76430200  | 1.43253500  |
| O  | 1.41570100  | -0.96152500 | 2.68918900  |
| O  | 0.83192600  | 1.64785900  | -3.15149700 |
| O  | 2.97223200  | 3.34390800  | -2.88223200 |
| O  | -0.90924500 | -0.24664500 | 1.18736800  |
| O  | -0.36218900 | -3.07321400 | -1.43109300 |
| O  | 4.19188700  | -1.42096500 | 2.60251000  |
| O  | 2.89495900  | 0.76641200  | -1.71328300 |
| O  | 1.61014700  | -1.04583000 | -3.18917500 |
| O  | 2.92514800  | 3.31857100  | 2.59402200  |
| O  | -1.78891000 | 2.49934900  | 1.18151800  |
| O  | -0.98873400 | -0.24762400 | -1.48471100 |
| O  | -1.22367400 | -1.79214000 | -3.63641300 |
| O  | 2.71642400  | 2.92265400  | -0.14322300 |
| O  | 0.55580800  | 3.72533200  | 1.18059100  |
| O  | 3.82460300  | -1.19150700 | -0.12962000 |
| O  | -3.24250700 | 0.75846400  | -0.09838800 |
| O  | 2.32859800  | -2.95131100 | 1.18852500  |
| O  | -3.26251900 | -0.87394700 | 2.03999000  |
| O  | 1.12376700  | -5.06707800 | -0.16041300 |
| O  | -1.76694800 | 0.89890700  | 3.31710100  |
| O  | -2.82557800 | -3.61628000 | 2.30080200  |
| O  | 0.26280000  | 0.06115800  | 5.03292300  |
| O  | -4.24743300 | 1.72563300  | 2.31248600  |

|    |             |             |             |
|----|-------------|-------------|-------------|
| O  | -2.92322200 | -3.63369600 | -2.51770700 |
| O  | 0.56462100  | 3.73977300  | -1.47338100 |
| O  | -1.54821800 | 4.96063300  | -0.15014100 |
| O  | -1.08030900 | -1.67430000 | 3.31111900  |
| O  | -3.36067200 | -0.89076900 | -2.21734700 |
| Fe | -0.16602000 | -0.04967600 | -3.45636700 |

SiW<sub>11</sub>Fe<sup>II</sup>-NO

-6 4

|    |             |             |             |
|----|-------------|-------------|-------------|
| W  | -2.23960400 | -1.81282600 | -2.11219500 |
| W  | -2.72650400 | -1.80013100 | 1.25043700  |
| W  | -0.05786000 | 3.51015300  | -0.13962400 |
| W  | 2.70814100  | -1.72366100 | -1.64500100 |
| W  | -2.67215400 | 1.91109700  | 1.20563200  |
| W  | 2.21246000  | -1.68491000 | 2.07466000  |
| W  | 2.27022100  | 1.65859800  | 2.03557400  |
| W  | -0.33296800 | 0.04766700  | 3.41192800  |
| W  | -2.17782400 | 1.83564500  | -2.15405400 |
| W  | -0.16849000 | -3.50962300 | -0.06450300 |
| W  | 2.75968400  | 1.60440800  | -1.68540900 |
| Si | 0.03656100  | -0.00153900 | -0.10995600 |
| O  | 3.98688100  | -2.84618100 | -1.90605000 |
| O  | -1.26999700 | 3.47628400  | -1.61376300 |
| O  | -0.89678000 | 1.34625300  | -0.25140900 |
| O  | 2.06425600  | -1.49193200 | -3.31094000 |
| O  | -3.29978400 | 2.47739500  | -3.29200400 |
| O  | 0.96459900  | 2.87627200  | 1.34599100  |
| O  | -1.48253000 | -1.23949500 | 2.61178400  |
| O  | -0.93703200 | -1.32349900 | -0.22150700 |
| O  | 1.25733700  | -2.92034000 | -1.16089900 |
| O  | 2.93957800  | 1.52526300  | 0.31882500  |
| O  | -3.14610200 | 0.06176500  | 1.11382800  |
| O  | -1.44372000 | 1.34828700  | 2.58313100  |
| O  | -0.85302200 | -1.38418200 | -3.15832900 |
| O  | -3.38566000 | -2.44454300 | -3.23165700 |
| O  | 0.77244700  | 0.00433100  | 1.36342200  |
| O  | 1.34801400  | 2.85496300  | -1.22698600 |
| O  | -3.95790900 | 2.53831800  | 2.15575400  |
| O  | -2.77028000 | 0.02221500  | -1.98559600 |
| O  | -0.80302300 | 1.33458700  | -3.18527700 |
| O  | -4.02967000 | -2.36492900 | 2.21581900  |
| O  | 0.87463100  | -2.87734300 | 1.41157700  |
| O  | 1.16581200  | -0.03207600 | -1.29401300 |
| O  | 2.11204400  | 1.35375600  | -3.34554000 |
| O  | -3.38432800 | -2.09097100 | -0.46571200 |
| O  | -1.69910200 | -3.41900400 | 1.10301700  |
| O  | -3.31828100 | 2.18500500  | -0.51745900 |
| O  | 2.88849500  | -1.60759800 | 0.35566700  |
| O  | -1.59340800 | 3.49351900  | 1.02386400  |
| O  | 3.07832800  | -0.02006900 | 2.51985600  |
| O  | 0.30449300  | 5.18782500  | -0.10015800 |
| O  | 1.01012900  | -1.30507700 | 3.56207700  |
| O  | 3.37223600  | 2.73998900  | 2.79154500  |
| O  | -0.91677800 | 0.07422600  | 5.02825600  |
| O  | 3.28194500  | -2.78062700 | 2.85604200  |
| O  | 4.07444800  | 2.67893400  | -1.96905200 |

|    |             |             |             |
|----|-------------|-------------|-------------|
| O  | -1.38030100 | -3.47062500 | -1.53605600 |
| O  | 0.14286100  | -5.19625700 | 0.01128700  |
| O  | 1.05367400  | 1.35661200  | 3.53141300  |
| O  | 3.70384200  | -0.07567000 | -1.67955500 |
| Fe | 0.62049300  | -0.05141000 | -3.51523500 |
| N  | 0.68033600  | -0.07972100 | -5.37071500 |
| O  | 1.42609000  | -0.14269900 | -6.27625100 |

SiW<sub>11</sub>Fe<sup>II</sup>-HNO

-6 5

|    |             |             |             |
|----|-------------|-------------|-------------|
| W  | -2.86223800 | 0.97549500  | 1.91335800  |
| W  | -3.01059300 | 1.00945100  | -1.48569200 |
| W  | 0.96708700  | -3.37398400 | 0.03727400  |
| W  | 1.92010600  | 2.32709500  | 1.96821500  |
| W  | -1.86368100 | -2.52365500 | -1.53408000 |
| W  | 1.81095300  | 2.36540700  | -1.78463400 |
| W  | 2.83244400  | -0.81840200 | -1.84688600 |
| W  | 0.00751500  | 0.06226300  | -3.43625500 |
| W  | -1.73338900 | -2.49690400 | 1.86186700  |
| W  | -1.19250300 | 3.29932000  | 0.13967800  |
| W  | 2.97390800  | -0.83251200 | 1.90711100  |
| Si | 0.02774300  | 0.01085300  | 0.10841200  |
| O  | 2.77549400  | 3.75760400  | 2.39727400  |
| O  | -0.33406900 | -3.76863200 | 1.37771700  |
| O  | -0.47770900 | -1.55476000 | 0.11783000  |
| O  | 1.23704500  | 1.80616300  | 3.55599300  |
| O  | -2.71091500 | -3.50317300 | 2.85862700  |
| O  | 1.88706900  | -2.39806200 | -1.32833600 |
| O  | -1.53991700 | 0.91000600  | -2.73402100 |
| O  | -1.29845600 | 0.98437400  | 0.15392200  |
| O  | 0.22824900  | 3.07025800  | 1.37591700  |
| O  | 3.27901400  | -0.58920800 | -0.07333300 |
| O  | -2.86335500 | -0.89790900 | -1.44749300 |
| O  | -0.73864100 | -1.55586400 | -2.76604500 |
| O  | -1.51287000 | 0.92744000  | 3.07160000  |
| O  | -4.24266300 | 1.19012300  | 2.92321200  |
| O  | 0.86444600  | 0.29882400  | -1.27940400 |
| O  | 2.01934200  | -2.40410200 | 1.27093000  |
| O  | -2.81946500 | -3.44381200 | -2.62475200 |
| O  | -2.81777600 | -0.92987200 | 1.69526800  |
| O  | -0.66194600 | -1.68122900 | 3.05311800  |
| O  | -4.32867000 | 1.22468800  | -2.56581800 |
| O  | 0.12524100  | 3.07994000  | -1.22853200 |
| O  | 0.99011000  | 0.28597200  | 1.40448900  |
| O  | 2.16250100  | -0.89511300 | 3.50123800  |
| O  | -3.87935400 | 0.99420500  | 0.15619600  |
| O  | -2.51519400 | 2.84166900  | -1.19000700 |
| O  | -2.56135100 | -3.06312500 | 0.10915400  |
| O  | 2.31102300  | 2.39229600  | -0.00444000 |
| O  | -0.39568300 | -3.73666500 | -1.27889000 |
| O  | 3.15693700  | 1.05346500  | -2.19240400 |
| O  | 1.79996000  | -4.87476900 | -0.00718200 |
| O  | 0.90691800  | 1.74815400  | -3.40013600 |
| O  | 4.26616800  | -1.48828400 | -2.51948100 |
| O  | -0.38750000 | -0.03813800 | -5.10608700 |
| O  | 2.57807700  | 3.76893200  | -2.41531300 |
| O  | 4.52426500  | -1.49316100 | 2.26210300  |



|    |             |             |             |
|----|-------------|-------------|-------------|
| O  | -2.48431300 | 2.84057000  | 1.46125100  |
| O  | -1.37375200 | 5.00687100  | 0.14412400  |
| O  | 1.72140800  | -0.78442000 | -3.44782800 |
| O  | 3.36082200  | 1.05009300  | 2.04574700  |
| Fe | 0.27566600  | 0.02290000  | 3.52363600  |
| N  | -0.09288900 | -0.29497100 | 5.44723000  |
| O  | 0.37063700  | 0.22721900  | 6.46215100  |
| H  | -0.74551900 | -1.07555600 | 5.67351800  |

SiW<sub>11</sub>Fe<sup>II</sup>-NHOH

|      |             |             |             |
|------|-------------|-------------|-------------|
| -6 4 |             |             |             |
| W    | -0.73707200 | 3.09538400  | 1.59589900  |
| W    | -1.69656000 | 2.58873700  | -1.62894600 |
| W    | -1.72376500 | -2.86234700 | 1.09580000  |
| W    | 3.44119200  | 0.42886300  | 1.02842900  |
| W    | -3.43271300 | -0.52253700 | -0.57157800 |
| W    | 2.37388300  | -0.19027000 | -2.52010200 |
| W    | 0.82215600  | -2.99053100 | -1.56630200 |
| W    | -0.86906000 | -0.63957400 | -3.26490200 |
| W    | -2.44544500 | 0.04681900  | 2.65132400  |
| W    | 1.53712400  | 3.01152100  | -0.88989800 |
| W    | 1.87666300  | -2.35791800 | 1.98339200  |
| Si   | 0.04334400  | -0.00496700 | 0.10552300  |
| O    | 5.12292100  | 0.75260000  | 0.86161700  |
| O    | -2.53994000 | -1.90529400 | 2.52516000  |
| O    | -1.38636600 | -0.61752200 | 0.64795300  |
| O    | 3.14445400  | 0.96353700  | 2.72894000  |
| O    | -3.60020100 | 0.33409100  | 3.90039900  |
| O    | -0.77339500 | -3.18979100 | -0.53845600 |
| O    | -1.10620700 | 1.19771100  | -2.83071600 |
| O    | -0.14779700 | 1.61489200  | -0.12492300 |
| O    | 2.65700000  | 2.04444700  | 0.29971700  |
| O    | 1.74505200  | -2.82464800 | 0.02337800  |
| O    | -2.92531700 | 1.27447300  | -0.98691300 |
| O    | -2.30802500 | -0.98133400 | -2.08720400 |
| O    | 0.43003100  | 2.27833500  | 2.66885300  |
| O    | -1.23927800 | 4.45378100  | 2.52998100  |
| O    | 0.43168900  | -0.70650300 | -1.33372200 |
| O    | -0.02068800 | -2.77441700 | 1.91794500  |
| O    | -4.98590100 | -0.61006400 | -1.30188900 |
| O    | -2.10549500 | 1.81333700  | 1.99151000  |
| O    | -0.91572300 | -0.01570100 | 3.54000100  |
| O    | -2.70384000 | 3.50446800  | -2.67736600 |
| O    | 1.89861800  | 1.63087100  | -2.16018000 |
| O    | 1.23268500  | -0.28003200 | 1.19620200  |
| O    | 1.70824600  | -1.47569100 | 3.53220700  |
| O    | -1.85549400 | 3.54130400  | -0.03950400 |
| O    | -0.00997800 | 3.45542800  | -1.95057100 |
| O    | -3.85957500 | -0.04132100 | 1.15682600  |
| O    | 3.18988300  | -0.20827700 | -0.86230700 |
| O    | -3.22069400 | -2.34673300 | -0.00407500 |
| O    | 2.25530300  | -2.11053800 | -2.51625800 |
| O    | -2.21395000 | -4.45697300 | 1.50624200  |
| O    | 0.92098100  | -0.22456400 | -3.81299500 |
| O    | 1.13376200  | -4.61942000 | -2.02451800 |
| O    | -1.64044600 | -0.73002100 | -4.79971000 |
| O    | 3.70000600  | 0.01912800  | -3.59581200 |

|    |             |             |             |
|----|-------------|-------------|-------------|
| O  | 2.53853900  | -3.86507500 | 2.49324100  |
| O  | 0.70559100  | 3.92206300  | 0.56212700  |
| O  | 2.60828600  | 4.24149400  | -1.42907400 |
| O  | -0.31007100 | -2.45747900 | -3.06356500 |
| O  | 3.50259100  | -1.43456900 | 1.49413500  |
| Fe | 1.09327400  | 0.47304900  | 3.28320000  |
| N  | 1.79061600  | 1.14550900  | 5.19428000  |
| O  | 3.04624200  | 1.58767000  | 5.17256900  |
| H  | 1.45729100  | 1.30484200  | 6.14632800  |
| H  | 3.31467300  | 1.41473200  | 4.20857700  |

SiW<sub>11</sub>Fe<sup>II</sup>-NH<sub>2</sub>OH

-6 5

|    |             |             |             |
|----|-------------|-------------|-------------|
| W  | -1.92039300 | 2.52365300  | 1.61351800  |
| W  | -1.03217400 | 2.89889800  | -1.65096600 |
| W  | -1.50071200 | -3.08939100 | -0.63843700 |
| W  | 2.33833700  | 0.22949900  | 2.79556800  |
| W  | -2.48557000 | -0.43047500 | -2.41362100 |
| W  | 3.34844800  | 0.58370700  | -0.82185000 |
| W  | 2.01633100  | -2.40699300 | -1.49969400 |
| W  | 1.06252300  | 0.28364200  | -3.26602000 |
| W  | -3.40346000 | -0.73591500 | 0.85587100  |
| W  | 1.27636500  | 3.18527400  | 0.75653300  |
| W  | 1.01921400  | -2.75173300 | 2.11162400  |
| Si | 0.01582200  | -0.02393100 | 0.11338900  |
| O  | 3.79416900  | 0.63194900  | 3.62775300  |
| O  | -3.08449400 | -2.58414600 | 0.29470800  |
| O  | -1.36428900 | -0.80084200 | -0.34022100 |
| O  | 1.13343800  | 0.26228400  | 4.10259600  |
| O  | -5.05241600 | -0.82996700 | 1.34368400  |
| O  | 0.17950400  | -2.92901900 | -1.54904300 |
| O  | 0.30548400  | 1.90709300  | -2.62481000 |
| O  | -0.30646800 | 1.58899300  | 0.18780800  |
| O  | 1.79721200  | 1.96360000  | 2.10540400  |
| O  | 1.96564900  | -2.66698500 | 0.32606200  |
| O  | -2.17720100 | 1.42979500  | -2.07218600 |
| O  | -0.70781700 | -0.41334200 | -3.14629000 |
| O  | -1.36051900 | 1.47159200  | 2.94202000  |
| O  | -3.04988200 | 3.56059800  | 2.39870800  |
| O  | 1.19121100  | -0.28866200 | -1.00919200 |
| O  | -0.49259900 | -3.17975500 | 0.95611100  |
| O  | -3.42309600 | -0.35690600 | -3.85179900 |
| O  | -3.06380300 | 1.14323700  | 0.91850100  |
| O  | -2.53789200 | -1.02316900 | 2.39415700  |
| O  | -1.50955700 | 4.04453800  | -2.83954200 |
| O  | 2.45755600  | 2.22914000  | -0.40244100 |
| O  | 0.52435300  | -0.55646800 | 1.57637200  |
| O  | -0.06063800 | -2.34047600 | 3.48306500  |
| O  | -2.12057300 | 3.37321500  | -0.22147900 |
| O  | 0.41869800  | 3.86270400  | -0.83050700 |
| O  | -3.81148300 | -0.45457500 | -1.11038500 |
| O  | 3.21353700  | 0.12847900  | 0.94616800  |
| O  | -2.30034700 | -2.33130700 | -2.22618100 |
| O  | 3.56022500  | -1.26292700 | -1.33122000 |
| O  | -1.85609100 | -4.74813800 | -0.91173400 |
| O  | 2.77010500  | 0.87666400  | -2.67649400 |
| O  | 2.78629200  | -3.83603900 | -2.07059500 |

|    |             |             |             |
|----|-------------|-------------|-------------|
| O  | 1.18824700  | 0.60462300  | -4.95135600 |
| O  | 4.97954200  | 1.11417100  | -0.96585100 |
| O  | 1.56946600  | -4.32788400 | 2.53872000  |
| O  | -0.31793600 | 3.63233400  | 1.71281700  |
| O  | 2.23977400  | 4.55128600  | 1.15384900  |
| O  | 1.71458000  | -1.51070900 | -3.21003000 |
| O  | 2.48436400  | -1.69686600 | 2.77436700  |
| Fe | -0.76101400 | -0.41165500 | 3.35256400  |
| N  | -1.96359500 | -0.50517200 | 5.20776400  |
| O  | -3.30161800 | -0.87746900 | 4.92420100  |
| H  | -2.00962900 | 0.39637300  | 5.67854900  |
| H  | -1.61559900 | -1.17382500 | 5.89200600  |
| H  | -3.26156800 | -1.00578800 | 3.94835300  |

SiW<sub>11</sub>Fe<sup>II</sup>-NH<sub>2</sub>-H<sub>2</sub>O

-6 6

|    |             |             |             |
|----|-------------|-------------|-------------|
| W  | -2.34330500 | 2.47663300  | 0.92728300  |
| W  | -1.11914200 | 2.42446500  | -2.23669200 |
| W  | -1.04203400 | -3.34849900 | -0.24495500 |
| W  | 1.92399000  | 0.97587200  | 2.90443800  |
| W  | -2.10156000 | -1.14411300 | -2.52807800 |
| W  | 3.34296500  | 0.86840700  | -0.56615600 |
| W  | 2.45491000  | -2.34402500 | -0.81727700 |
| W  | 1.42199300  | -0.13759400 | -3.13028500 |
| W  | -3.30165900 | -1.03273400 | 0.63322900  |
| W  | 0.82456300  | 3.41340000  | 0.29813600  |
| W  | 1.02156500  | -2.21107600 | 2.65124700  |
| Si | 0.00935500  | -0.00547900 | 0.11091000  |
| O  | 3.15364400  | 1.70101700  | 3.86621900  |
| O  | -2.76602100 | -2.89379900 | 0.44417700  |
| O  | -1.19256800 | -1.02959000 | -0.35543200 |
| O  | 0.50183600  | 1.03126300  | 4.00786800  |
| O  | -4.95305600 | -1.23155700 | 1.10230800  |
| O  | 0.70432400  | -3.11065900 | -0.97228700 |
| O  | 0.42831300  | 1.46353000  | -2.88129300 |
| O  | -0.48798700 | 1.54302000  | -0.14186700 |
| O  | 1.29489700  | 2.50574200  | 1.88922300  |
| O  | 2.18445500  | -2.31255500 | 1.01218600  |
| O  | -2.03340600 | 0.76410400  | -2.49174700 |
| O  | -0.26202900 | -1.02808200 | -3.08440100 |
| O  | -1.78253700 | 1.72606200  | 2.46064600  |
| O  | -3.66637500 | 3.45288800  | 1.43449800  |
| O  | 1.34023800  | -0.29918300 | -0.81301200 |
| O  | -0.25475400 | -3.04195100 | 1.45057700  |
| O  | -2.88091100 | -1.42367000 | -4.03166200 |
| O  | -3.21754600 | 0.86773800  | 0.38937300  |
| O  | -2.47719800 | -0.89811700 | 2.21259300  |
| O  | -1.58111800 | 3.27821500  | -3.65263800 |
| O  | 2.23326000  | 2.42367800  | -0.53499100 |
| O  | 0.37022500  | -0.22611300 | 1.68878600  |
| O  | -0.27054600 | -1.67721400 | 3.79484400  |
| O  | -2.42492600 | 2.98000000  | -1.02902500 |
| O  | 0.10102500  | 3.69255700  | -1.46772900 |
| O  | -3.56155500 | -1.12285700 | -1.35950800 |
| O  | 3.03383500  | 0.70507000  | 1.24935200  |
| O  | -1.74045300 | -2.95624700 | -1.99866500 |
| O  | 3.82185000  | -0.99607400 | -0.68225400 |

|    |             |             |             |
|----|-------------|-------------|-------------|
| O  | -1.17645500 | -5.05932100 | -0.25731800 |
| O  | 2.97685100  | 0.76203700  | -2.47863200 |
| O  | 3.44381500  | -3.73261900 | -1.03296300 |
| O  | 1.73549000  | -0.09219500 | -4.81882300 |
| O  | 4.91007000  | 1.57141000  | -0.62212200 |
| O  | 1.65841600  | -3.59479900 | 3.45174200  |
| O  | -0.91105400 | 3.80283500  | 0.98459200  |
| O  | 1.58317100  | 4.93423900  | 0.53672700  |
| O  | 2.26546700  | -1.79379600 | -2.67648100 |
| O  | 2.27243300  | -0.88286900 | 3.26976500  |
| Fe | -1.19306200 | 0.07890100  | 3.39797500  |
| N  | -2.28205100 | 0.21908100  | 4.98323700  |
| O  | -4.86807800 | 0.24681900  | 3.77004700  |
| H  | -2.26857600 | 1.10079000  | 5.48918500  |
| H  | -2.20641400 | -0.53243200 | 5.66366500  |
| H  | -4.84492100 | -0.28297300 | 2.96263900  |
| H  | -3.94659500 | 0.20019000  | 4.11458700  |

SiW<sub>11</sub>Fe<sup>II</sup>-NH<sub>3</sub>-H<sub>2</sub>O

|      |             |             |             |
|------|-------------|-------------|-------------|
| -6 5 |             |             |             |
| W    | -3.12145700 | 1.44875000  | 1.00602100  |
| W    | -2.04081700 | 1.76099100  | -2.22159200 |
| W    | 0.28931200  | -3.48808300 | -0.15175600 |
| W    | 1.55423300  | 1.69226000  | 2.80700100  |
| W    | -1.62243100 | -1.92459400 | -2.41165900 |
| W    | 2.74525900  | 2.03663200  | -0.74968900 |
| W    | 3.12863100  | -1.27606400 | -0.92243900 |
| W    | 1.23898400  | 0.31101800  | -3.20365200 |
| W    | -2.65396300 | -2.17050400 | 0.81581600  |
| W    | -0.51057900 | 3.45179500  | 0.23120500  |
| W    | 1.93397100  | -1.61146700 | 2.64192100  |
| Si   | 0.02427000  | -0.00035900 | 0.12188800  |
| O    | 2.48331100  | 2.86790200  | 3.65897000  |
| O    | -1.44875900 | -3.69377000 | 0.61709300  |
| O    | -0.73156600 | -1.40991400 | -0.27437000 |
| O    | 0.28773000  | 1.27436700  | 4.00477700  |
| O    | -4.09705300 | -2.97057200 | 1.33049000  |
| O    | 1.78941100  | -2.64509400 | -0.98625300 |
| O    | -0.26829200 | 1.43195300  | -2.90849500 |
| O    | -1.04338600 | 1.23343300  | -0.10784700 |
| O    | 0.33234100  | 2.83623800  | 1.80568100  |
| O    | 2.96450900  | -1.27983400 | 0.89880500  |
| O    | -2.27125900 | -0.13073900 | -2.42510300 |
| O    | 0.02036200  | -1.14247100 | -3.05909400 |
| O    | -2.43482900 | 0.99208700  | 2.58811600  |
| O    | -4.73384200 | 1.88743400  | 1.42917000  |
| O    | 1.32113300  | 0.20104800  | -0.87592000 |
| O    | 0.99568200  | -2.86591300 | 1.48777600  |
| O    | -2.28967700 | -2.52802800 | -3.87572800 |
| O    | -3.30832200 | -0.39784500 | 0.51501200  |
| O    | -1.92153200 | -1.71094800 | 2.37348600  |
| O    | -2.82241000 | 2.34717600  | -3.63565600 |
| O    | 1.12575400  | 3.06454800  | -0.66847900 |
| O    | 0.52152200  | -0.03899400 | 1.68106500  |
| O    | 0.67018600  | -1.64921000 | 3.88613700  |
| O    | -3.41541900 | 1.81203900  | -0.98726000 |
| O    | -1.36113100 | 3.40738600  | -1.49998100 |

|    |             |             |             |
|----|-------------|-------------|-------------|
| O  | -2.92812400 | -2.41998400 | -1.18105700 |
| O  | 2.59517500  | 1.81501800  | 1.07467100  |
| O  | -0.57462000 | -3.44545900 | -1.87577500 |
| O  | 3.89176800  | 0.49937000  | -0.89010700 |
| O  | 0.80180200  | -5.12810800 | -0.13944500 |
| O  | 2.35676100  | 1.75867500  | -2.64066500 |
| O  | 4.55802800  | -2.19712900 | -1.19089800 |
| O  | 1.42654500  | 0.43151500  | -4.90954600 |
| O  | 3.92100600  | 3.28543500  | -0.88967500 |
| O  | 3.15108700  | -2.62291100 | 3.32959800  |
| O  | -2.25315200 | 3.18439500  | 0.99400800  |
| O  | -0.38585500 | 5.15435500  | 0.42955200  |
| O  | 2.66402400  | -0.88094800 | -2.78688200 |
| O  | 2.60711000  | 0.12333000  | 3.16029700  |
| Fe | -0.91774700 | -0.26994000 | 3.38994300  |
| N  | -1.95120100 | -0.57646500 | 5.29623700  |
| O  | -4.43581400 | -0.75257000 | 3.73288600  |
| H  | -1.97369600 | 0.24307300  | 5.89479100  |
| H  | -1.53760900 | -1.33322800 | 5.83136200  |
| H  | -4.30770300 | -1.55200700 | 3.20496900  |
| H  | -3.81010000 | -0.12781900 | 3.32123600  |
| H  | -2.91702000 | -0.82383900 | 5.06703700  |

SiW<sub>11</sub>Fe<sup>II</sup>-NH<sub>4</sub>-H<sub>2</sub>O

-5 5

|    |             |             |             |
|----|-------------|-------------|-------------|
| W  | 2.47635400  | 2.32229600  | 1.16302100  |
| W  | 1.62243900  | 2.22151300  | -2.12768600 |
| W  | -3.34810700 | 0.55027800  | 0.99324500  |
| W  | 1.77619000  | -2.74654100 | 1.57786900  |
| W  | -1.91847200 | 2.72400900  | -1.11443400 |
| W  | 0.82758200  | -2.67097400 | -2.04605100 |
| W  | -2.36561200 | -2.30733400 | -1.11985400 |
| W  | -0.99114500 | -0.14331400 | -3.29166700 |
| W  | -1.02419500 | 2.68833600  | 2.17432300  |
| W  | 3.36668400  | -0.30483800 | -0.79392400 |
| W  | -1.40615600 | -2.25670900 | 2.51743300  |
| Si | -0.00302000 | -0.02164800 | 0.11307500  |
| O  | 2.79358600  | -4.12606700 | 1.71173000  |
| O  | -2.81787400 | 1.94859800  | 2.19161200  |
| O  | -1.16408500 | 1.09514300  | 0.44227800  |
| O  | 2.15517400  | -1.86402600 | 3.12068100  |
| O  | -1.23597600 | 4.04625500  | 3.20954500  |
| O  | -3.22653000 | -0.75069900 | -0.39237400 |
| O  | 0.59392000  | 0.90315300  | -3.05821400 |
| O  | 1.39118900  | 0.76759000  | -0.25314600 |
| O  | 2.95835100  | -1.48020400 | 0.62677700  |
| O  | -1.84595200 | -2.72730800 | 0.59128200  |
| O  | -0.08114600 | 2.91640600  | -1.58298500 |
| O  | -1.88326700 | 1.23780800  | -2.37012200 |
| O  | 2.32285100  | 1.15821800  | 2.54383800  |
| O  | 3.49730700  | 3.53353200  | 1.83222800  |
| O  | -0.46983600 | -0.94779000 | -1.16138800 |
| O  | -2.55995400 | -0.75920500 | 2.12820200  |
| O  | -2.64866100 | 3.93378300  | -2.08882900 |
| O  | 0.74372100  | 3.02027300  | 1.43626500  |
| O  | -0.38424900 | 1.44624400  | 3.26674300  |
| O  | 2.02747100  | 3.28404300  | -3.41281000 |

|    |             |             |             |
|----|-------------|-------------|-------------|
| O  | 2.27022200  | -1.44185900 | -1.89345100 |
| O  | 0.23756700  | -0.96919800 | 1.43495700  |
| O  | -0.64988800 | -1.47062100 | 3.92529600  |
| O  | 2.41953900  | 3.09783300  | -0.67424700 |
| O  | 3.11570600  | 1.02927800  | -2.17715300 |
| O  | -1.66255000 | 3.63068900  | 0.47633600  |
| O  | 1.12748900  | -3.09493400 | -0.25401000 |
| O  | -3.49250900 | 1.89337700  | -0.37554400 |
| O  | -0.96604600 | -3.37742200 | -1.88084900 |
| O  | -5.00116000 | 0.41663300  | 1.43295700  |
| O  | 0.16751700  | -1.66318600 | -3.55175400 |
| O  | -3.71122500 | -3.34395000 | -1.38002100 |
| O  | -1.39245900 | 0.20325500  | -4.92533200 |
| O  | 1.57579900  | -3.97792500 | -2.87261400 |
| O  | -2.49823400 | -3.36789000 | 3.24695300  |
| O  | 3.83673400  | 1.10862600  | 0.38558700  |
| O  | 4.93810800  | -0.84959200 | -1.22123600 |
| O  | -2.37716200 | -1.35834800 | -2.83999400 |
| O  | 0.12399600  | -3.43228800 | 2.21974400  |
| Fe | 0.87473700  | -0.18254100 | 3.26888000  |
| N  | 4.40002900  | -0.49551400 | 2.89329400  |
| O  | 1.63095400  | 0.63039200  | 5.18988800  |
| H  | 4.88448900  | -0.74615600 | 2.03642000  |
| H  | 3.69354700  | -1.23698200 | 3.12657300  |
| H  | 0.87926600  | 1.12681900  | 5.54092400  |
| H  | 2.17880800  | 1.30106200  | 4.75113700  |
| H  | 5.05654300  | -0.32486400 | 3.64897300  |
| H  | 3.78712500  | 0.33144200  | 2.70601200  |

SiW<sub>11</sub>Fe<sup>II</sup>-NHO-TS-PCM

-6 5

|    |             |             |             |
|----|-------------|-------------|-------------|
| W  | 3.42635400  | -0.62181500 | 1.01616500  |
| W  | 2.66782300  | -0.05140300 | -2.23990900 |
| W  | -1.51176500 | 3.01206200  | 0.98424100  |
| W  | -1.04581200 | -3.00848400 | 1.71739100  |
| W  | 1.01350600  | 3.10390800  | -1.21108500 |
| W  | -1.72724400 | -2.31172400 | -1.91280100 |
| W  | -3.30277700 | 0.50356500  | -1.02572000 |
| W  | -0.82650000 | 0.61455500  | -3.28612300 |
| W  | 1.62829500  | 2.42080300  | 2.06107000  |
| W  | 1.72727100  | -2.92049900 | -0.79163800 |
| W  | -2.57349100 | -0.18777700 | 2.60614700  |
| Si | -0.02016700 | -0.03322200 | 0.11532500  |
| O  | -1.52460800 | -4.64585900 | 1.94112900  |
| O  | -0.02595400 | 3.42527200  | 2.13172000  |
| O  | 0.20767600  | 1.57125500  | 0.39840500  |
| O  | -0.09396100 | -2.67763400 | 3.20666100  |
| O  | 2.62327000  | 3.40374100  | 3.06180300  |
| O  | -2.52685400 | 2.13403300  | -0.36837800 |
| O  | 0.98580900  | -0.02738200 | -3.10676000 |
| O  | 1.43404300  | -0.69043900 | -0.28701900 |
| O  | 0.59908600  | -3.23824500 | 0.67440200  |
| O  | -3.29598600 | -0.12362600 | 0.69030600  |
| O  | 2.25437700  | 1.73350600  | -1.68604200 |
| O  | -0.18930000 | 2.16652700  | -2.40251500 |
| O  | 2.44403900  | -1.17234800 | 2.50061600  |
| O  | 5.01435100  | -0.69218800 | 1.65740100  |

|    |             |             |             |
|----|-------------|-------------|-------------|
| O  | -1.07996700 | -0.22264300 | -1.13033900 |
| O  | -2.07198100 | 1.63299900  | 2.15200500  |
| O  | 1.53117600  | 4.39099800  | -2.22232400 |
| O  | 2.92731500  | 1.17394800  | 1.33287200  |
| O  | 1.03422900  | 1.17166600  | 3.19309300  |
| O  | 3.72849300  | 0.23344800  | -3.55773500 |
| O  | 0.13327000  | -2.72908800 | -1.84241700 |
| O  | -0.63393500 | -0.74463200 | 1.45662600  |
| O  | -1.46970500 | -0.25929300 | 3.99785900  |
| O  | 3.91783400  | -0.13663900 | -0.80783600 |
| O  | 2.62049100  | -1.95417900 | -2.22678600 |
| O  | 1.95802400  | 3.45572700  | 0.35205900  |
| O  | -1.81871800 | -2.77644300 | -0.12369200 |
| O  | -0.54833900 | 3.90421400  | -0.42823400 |
| O  | -3.35132800 | -1.27537800 | -1.74915600 |
| O  | -2.57550500 | 4.28152100  | 1.43333300  |
| O  | -1.35011400 | -1.21343600 | -3.48006400 |
| O  | -4.93993400 | 0.97261300  | -1.25800900 |
| O  | -0.82712400 | 1.11671900  | -4.92900100 |
| O  | -2.35855200 | -3.70294900 | -2.69968400 |
| O  | -4.10422700 | 0.05123500  | 3.35860000  |
| O  | 3.20872700  | -2.42763100 | 0.30690000  |
| O  | 2.20536700  | -4.51559300 | -1.20867700 |
| O  | -2.59648900 | 1.04237100  | -2.78977300 |
| O  | -2.61256500 | -2.10621300 | 2.35629300  |
| Fe | 0.49374600  | -0.74477100 | 3.31216100  |
| N  | 2.11057200  | -1.14324600 | 4.85296600  |
| O  | 2.27005200  | -2.01768000 | 5.69119800  |
| H  | 2.65231300  | -1.20241200 | 3.67508800  |

SiW<sub>11</sub>Fe<sup>II</sup>-NHO-TS-HSM

|      |             |             |             |
|------|-------------|-------------|-------------|
| -6 5 |             |             |             |
| W    | -2.08813000 | 2.45493400  | 1.52946900  |
| W    | 0.16623000  | 3.40868400  | -0.84547500 |
| W    | -1.39618400 | -2.34113900 | -2.18919600 |
| W    | 0.90657300  | -1.08624800 | 3.31645400  |
| W    | -1.16398800 | 0.85159000  | -3.18391900 |
| W    | 3.43878100  | -0.07680800 | 0.72600900  |
| W    | 2.19168500  | -2.35199500 | -1.38135300 |
| W    | 2.44433500  | 0.86116600  | -2.33677700 |
| W    | -3.42647700 | -0.02165300 | -0.82808400 |
| W    | 1.21353100  | 2.46907100  | 2.18817400  |
| W    | -0.31943800 | -3.38307700 | 1.23784900  |
| Si   | -0.00939600 | -0.03890800 | 0.07791500  |
| O    | 1.84144600  | -1.28520600 | 4.74893200  |
| O    | -3.14829200 | -1.70620900 | -1.77988300 |
| O    | -1.12291600 | -0.30258700 | -1.10644000 |
| O    | -0.77007600 | -1.09758500 | 3.95484200  |
| O    | -5.13501300 | 0.10561800  | -0.95948000 |
| O    | 0.51308300  | -2.35205100 | -2.29986500 |
| O    | 1.66472600  | 2.38322300  | -1.52484500 |
| O    | -0.14656700 | 1.52602000  | 0.57167500  |
| O    | 0.92014700  | 0.84853400  | 3.12171300  |
| O    | 1.32469500  | -3.05646800 | 0.07180100  |
| O    | -0.84079700 | 2.41181300  | -2.13612300 |
| O    | 0.72273900  | 0.61865100  | -3.17118100 |
| O    | -2.29866400 | 1.01988800  | 2.53775800  |

|    |             |             |             |
|----|-------------|-------------|-------------|
| O  | -3.31324800 | 3.52252200  | 2.10712000  |
| O  | 1.49722100  | -0.28978300 | -0.53987600 |
| O  | -1.20180000 | -3.10988700 | -0.48233600 |
| O  | -1.40933000 | 1.53464800  | -4.73935600 |
| O  | -2.96596700 | 1.60371800  | 0.03107500  |
| O  | -3.30578500 | -0.94384900 | 0.77006200  |
| O  | 0.40100900  | 4.89286400  | -1.67817100 |
| O  | 2.64935200  | 1.56943300  | 1.30802400  |
| O  | -0.27794000 | -1.05822600 | 1.33000000  |
| O  | -1.82721500 | -3.12926300 | 2.14173400  |
| O  | -1.37022300 | 3.75941300  | 0.11891800  |
| O  | 1.22707300  | 3.72669800  | 0.72286500  |
| O  | -2.94840000 | 0.82451300  | -2.53266800 |
| O  | 2.48292300  | -0.91857200 | 2.05376800  |
| O  | -1.35727100 | -1.00577400 | -3.59553500 |
| O  | 3.63215400  | -1.71482700 | -0.25831200 |
| O  | -1.79469500 | -3.71678000 | -3.13639000 |
| O  | 3.77599700  | 0.82888900  | -0.98378800 |
| O  | 2.96096200  | -3.72301500 | -2.07971200 |
| O  | 3.33271600  | 1.56761700  | -3.62732700 |
| O  | 5.01344700  | 0.04590800  | 1.40617600  |
| O  | -0.15798400 | -5.09888600 | 1.26484500  |
| O  | -0.56065300 | 3.07168100  | 2.56598900  |
| O  | 2.07231700  | 3.38754300  | 3.35788000  |
| O  | 2.77662200  | -0.98695000 | -2.65882000 |
| O  | 0.82822300  | -2.91279500 | 2.71427100  |
| N  | -3.89547300 | -1.32531900 | 3.64811800  |
| O  | -4.00659200 | -1.43942600 | 4.87025400  |
| H  | -4.86401200 | -1.45535900 | 2.79090500  |
| Fe | -2.17234200 | -1.05125900 | 2.48240300  |
| O  | -5.44829900 | -1.56299300 | 1.76328400  |
| H  | -6.05476300 | -0.81782300 | 1.65685900  |
| H  | -4.58529500 | -1.33160800 | 1.18585200  |

SiW<sub>11</sub>Fe<sup>II</sup>-NHOH-TS-PCM

|      |             |             |             |
|------|-------------|-------------|-------------|
| -6 6 |             |             |             |
| W    | -1.61985100 | 2.76734800  | 1.56841400  |
| W    | -1.98384100 | 2.26327100  | -1.77230400 |
| W    | -1.16638100 | -3.21182300 | 0.78942900  |
| W    | 3.19305500  | 1.03982800  | 1.36298000  |
| W    | -3.17958900 | -1.17214400 | -0.94798300 |
| W    | 2.57715300  | 0.47439600  | -2.27415700 |
| W    | 1.66072000  | -2.64908400 | -1.50852300 |
| W    | -0.38022000 | -0.69473000 | -3.33223500 |
| W    | -2.65498800 | -0.62526500 | 2.38206300  |
| W    | 0.94196700  | 3.32283000  | -0.55129200 |
| W    | 2.10600000  | -2.03836300 | 2.17285900  |
| Si   | 0.02532500  | 0.00046600  | 0.12864300  |
| O    | 4.76103000  | 1.73464600  | 1.41955800  |
| O    | -2.30135500 | -2.51926500 | 2.18046300  |
| O    | -1.29037100 | -0.92671500 | 0.47620400  |
| O    | 2.61746800  | 1.44667800  | 3.09258400  |
| O    | -3.96789700 | -0.66353700 | 3.49841900  |
| O    | 0.01808500  | -3.24049600 | -0.70217200 |
| O    | -0.99514000 | 1.04831900  | -2.89647000 |
| O    | -0.48615000 | 1.55001600  | -0.08844000 |
| O    | 2.08779900  | 2.52224000  | 0.71604200  |



|    |             |             |             |
|----|-------------|-------------|-------------|
| O  | 2.31580100  | -2.38206600 | 0.18159800  |
| O  | -2.99224500 | 0.67334700  | -1.32241800 |
| O  | -1.81237100 | -1.37521800 | -2.35933900 |
| O  | -0.38937800 | 2.21157300  | 2.71579600  |
| O  | -2.50667200 | 3.94603200  | 2.46329200  |
| O  | 0.71879200  | -0.53346700 | -1.26731200 |
| O  | 0.37038900  | -2.81868100 | 1.84509700  |
| O  | -4.58490500 | -1.56420000 | -1.85419200 |
| O  | -2.68820600 | 1.21359600  | 1.77653000  |
| O  | -1.26439000 | -0.32734800 | 3.42704600  |
| O  | -3.02635200 | 2.98780800  | -2.92880400 |
| O  | 1.74972400  | 2.11278000  | -1.83764700 |
| O  | 1.10214700  | -0.07979500 | 1.36884600  |
| O  | 1.62308100  | -1.29671900 | 3.71377000  |
| O  | -2.56843900 | 3.06727500  | -0.20244000 |
| O  | -0.49945500 | 3.45300800  | -1.85605400 |
| O  | -3.87601500 | -0.90388600 | 0.72371700  |
| O  | 3.23379000  | 0.51584900  | -0.47870300 |
| O  | -2.62091700 | -2.95171600 | -0.42623000 |
| O  | 2.93805000  | -1.42533600 | -2.25567700 |
| O  | -1.35162600 | -4.89095300 | 1.09602800  |
| O  | 1.35499800  | 0.16446200  | -3.68412100 |
| O  | 2.37296600  | -4.14625700 | -1.96579500 |
| O  | -0.92373600 | -0.86505900 | -4.95397100 |
| O  | 3.94881900  | 1.01092100  | -3.15854800 |
| O  | 3.01711900  | -3.40600600 | 2.69025600  |
| O  | -0.26136900 | 3.96612200  | 0.73574100  |
| O  | 1.78930800  | 4.76793100  | -0.92745700 |
| O  | 0.60098900  | -2.30921400 | -3.12396000 |
| O  | 3.55024700  | -0.75711300 | 1.88271900  |
| Fe | 0.64716200  | 0.58263800  | 3.32819600  |
| N  | 0.79521800  | 1.38255700  | 5.04688500  |
| O  | 1.77232600  | 2.27564900  | 5.12877100  |
| H  | 0.02306600  | 1.69349600  | 5.64232400  |
| H  | 2.38430900  | 1.94840200  | 4.14903400  |

SiW<sub>11</sub>Fe<sup>II</sup>-NHOH-TS-HSM

|      |             |             |             |
|------|-------------|-------------|-------------|
| -6 6 |             |             |             |
| W    | -0.91664600 | 2.73225400  | 2.11835100  |
| W    | -2.81724700 | 2.03424400  | -0.62337300 |
| W    | -0.42634000 | -3.25617700 | 1.23900100  |
| W    | 3.29358500  | 1.32883200  | -0.32067200 |
| W    | -3.17543500 | -1.46109900 | 0.60128800  |
| W    | 1.14508000  | 0.55664700  | -3.25398000 |
| W    | 0.90286200  | -2.58216400 | -2.13749600 |
| W    | -1.87801400 | -0.81429100 | -2.81073000 |
| W    | -1.22682400 | -0.69882000 | 3.28849000  |
| W    | 0.23312500  | 3.35197100  | -0.99097200 |
| W    | 3.00115000  | -1.80029600 | 0.87314300  |
| Si   | 0.05077300  | 0.01449400  | 0.07090900  |
| O    | 4.67219300  | 2.12968900  | -0.95713500 |
| O    | -0.84968700 | -2.60090800 | 2.96848700  |
| O    | -0.87543500 | -0.99743700 | 0.98184000  |
| O    | 3.52386100  | 1.72548900  | 1.50739100  |
| O    | -1.80926300 | -0.77668400 | 4.91011300  |
| O    | -0.08645200 | -3.25225700 | -0.64784200 |
| O    | -2.37663200 | 0.87290500  | -2.10453100 |

|    |             |             |             |
|----|-------------|-------------|-------------|
| O  | -0.62141300 | 1.51631300  | 0.12785900  |
| O  | 1.93099200  | 2.68973400  | -0.41278300 |
| O  | 2.26988800  | -2.18283600 | -0.97767100 |
| O  | -3.33433400 | 0.40574500  | 0.24976200  |
| O  | -2.63177700 | -1.57240800 | -1.26810300 |
| O  | 0.72840200  | 2.30741500  | 2.60367100  |
| O  | -1.39669700 | 3.88051400  | 3.31222600  |
| O  | 0.04524900  | -0.51397400 | -1.49112800 |
| O  | 1.39694000  | -2.70770500 | 1.42266200  |
| O  | -4.80735400 | -1.97724400 | 0.46688900  |
| O  | -1.65755500 | 1.10594000  | 2.79164500  |
| O  | 0.48673600  | -0.32907900 | 3.48693100  |
| O  | -4.33767700 | 2.63722300  | -1.14547200 |
| O  | 0.46303700  | 2.15189400  | -2.48373000 |
| O  | 1.58781300  | 0.06296700  | 0.66001800  |
| O  | 3.29841800  | -1.04785700 | 2.46651600  |
| O  | -2.63054000 | 2.87955700  | 1.01117200  |
| O  | -1.64350200 | 3.33649700  | -1.41793500 |
| O  | -3.02571300 | -1.16916800 | 2.41512300  |
| O  | 2.54469800  | 0.70872900  | -1.98586500 |
| O  | -2.29725200 | -3.16493400 | 0.81256500  |
| O  | 1.57838800  | -1.30724100 | -3.42183600 |
| O  | -0.29619700 | -4.93167300 | 1.58727500  |
| O  | -0.59177900 | 0.13354700  | -3.92036100 |
| O  | 1.43117000  | -4.04170100 | -2.87744300 |
| O  | -3.10768000 | -1.08597800 | -3.97948500 |
| O  | 1.88728700  | 1.15806100  | -4.68129800 |
| O  | 4.15712100  | -3.07576100 | 0.86176400  |
| O  | -0.21486000 | 3.96236200  | 0.73499500  |
| O  | 0.68693500  | 4.83784400  | -1.72005600 |
| O  | -0.81144200 | -2.37037200 | -3.06132600 |
| O  | 4.02015200  | -0.41368800 | -0.04678600 |
| Fe | 2.04536900  | 0.72787800  | 2.62601400  |
| N  | 2.61829100  | 1.23011000  | 4.37032900  |
| O  | 3.75595600  | 1.79976000  | 4.69487800  |
| H  | 1.87934100  | 1.60240200  | 4.97730500  |
| O  | 5.18639900  | 0.85781700  | 2.97130500  |
| H  | 4.82496000  | -0.04977100 | 2.90023800  |
| H  | 4.45799500  | 1.35892600  | 2.13724500  |
| H  | 4.62014800  | 1.27967100  | 3.82372800  |
